## Electrophysiological signatures of spatial boundaries in the human subiculum

Sang Ah Lee<sup>1,2</sup>, Jonathan F. Miller<sup>2</sup>, Andrew J. Watrous<sup>2</sup>, Michael Sperling<sup>3</sup>, Ashwini Sharan<sup>3</sup>, Gregory A. Worrell<sup>4</sup>, Brent M Berry<sup>4</sup>, Barbara C. Jobst<sup>5</sup>, Kathryn A. Davis<sup>6</sup>, Robert E. Gross<sup>7</sup>, Bradley Lega<sup>8</sup>, Sameer Sheth<sup>9</sup>, Sandhitsu R. Das<sup>6</sup>, Joel M. Stein<sup>6</sup>, Richard Gorniak<sup>3</sup>, Daniel S. Rizzuto<sup>10</sup>, Joshua Jacobs<sup>2</sup>

<sup>1</sup> Department of Bio and Brain Engineering, Korea Advanced Institute of Science and Technology, Daejeon, 34141

<sup>2</sup> Department of Biomedical Engineering, Columbia University, New York, NY 10027

<sup>3</sup> Thomas Jefferson University, Philadelphia, PA 19107

<sup>4</sup> Mayo Clinic, Rochester, MN 55902

<sup>5</sup> Geisel School of Medicine at Dartmouth, Hanover, NH 03755

<sup>6</sup> Hospital of the University of Pennsylvania, Philadelphia, PA 19104

<sup>7</sup> Department of Neurosurgery, Emory University, Atlanta, GA 30322

<sup>8</sup> University of Texas Southwestern, Dallas, TX 75390

<sup>9</sup> Department of Neurosurgery, Columbia University Medical Center, New York, NY 10027

<sup>10</sup> Department of Psychology, University of Pennsylvania, Philadelphia, PA 19104

Correspondence:

Sang Ah Lee

Department of Bio and Brain Engineering, Korea Advanced Institute of Science and Technology  
291 Daehak-ro, Yuseong-gu, Daejeon, 34141. Republic of Korea  
+82 042-350-7315 (tel), sangah.lee@kaist.ac.kr (e-mail)

Joshua Jacobs

Department of Biomedical Engineering, Columbia University  
1210 Amsterdam Avenue New York, NY 10027  
+1 212-854-2445 (tel), joshua.jacobs@columbia.edu (e-mail)

Conflict of Interest: The authors declare no competing financial interests.

Acknowledgments: The authors acknowledge support from the DARPA Restoring Active Memory (RAM) program (Cooperative Agreement N66001-14-2-4032) and NIH Grants MH104606, MH061975. The views, opinions and/or findings expressed are those of the author and should not be interpreted as representing the official views or policies of the Department of Defense or the U.S. Government.

## 1 **Abstract**

2 Environmental boundaries play a crucial role in spatial navigation and memory across a wide range  
3 of distantly-related species. In rodents, boundary representations have been identified at the single-  
4 cell level in the subiculum and entorhinal cortex of the hippocampal formation. While studies of  
5 hippocampal function and spatial behavior suggest that similar representations might exist in humans,  
6 boundary-related neural activity has not been identified electrophysiologically in humans until now.  
7 Here we present direct intracranial recordings from the hippocampal formation of surgical epilepsy  
8 patients while they performed a virtual spatial navigation task. Our results suggest that encoding  
9 target locations near boundaries elicited stronger theta oscillations than for target locations near the  
10 center of the environment and that this difference cannot be explained by variables such as trial length,  
11 speed, or movement. These findings provide the first direct evidence of boundary-dependent neural  
12 activity localized in humans to the subiculum, the homologue of the hippocampal subregion in which  
13 most boundary cells are found.

## 14 **Significance Statement**

15 Spatial computations using environmental boundaries are an integral part of the brain's spatial mapping  
16 system. In rodents, border/boundary cells in the subiculum and entorhinal cortex reveal boundary  
17 coding at the single-neuron level. Although there is good reason to believe that such representations  
18 also exist in humans, the evidence has thus far been limited to fMRI studies that broadly implicate the  
19 hippocampus in boundary-based navigation. By combining intracranial recordings with high-resolution  
20 imaging of hippocampal subregions we identified, for the first time in humans, a neural marker of  
21 boundary representation in the subiculum.

## 22 Introduction

23 Research across a wide range of disciplines has converged on the notion that environmental boundaries  
24 strongly influence spatial memory and cognition (Lee, 2017). When animals lose track of where they  
25 are, they rely heavily on boundary structures to find their way back to the goal (for review, see Cheng &  
26 Newcombe, 2005; Lee & Spelke, 2010; Tommasi et al., 2012). Non-boundary features such as objects  
27 and surface properties also influence navigation but are used primarily as beacons (e.g., Lee et al.,  
28 2006), contextual cues (e.g., Julian et al., 2015), and error-correcting landmarks in path integration  
29 (e.g., Etienne et al., 1996). To explain the effect of boundaries in behavior, theorists have proposed  
30 that the 3D structure of the environment provides a reliable basis for metric distance computations in  
31 spatial mapping (Cheng, 1986; Gallistel, 1990).

32 Electrophysiological recordings in the rodent hippocampal formation have shown that the spatial  
33 coding by place cells and grid cells is highly influenced by environmental boundaries (O'Keefe &  
34 Burgess, 1996; Krupic et al., 2015; Stensola et al., 2015; Lever et al., 2002; Hardcastle et al., 2015).  
35 Boundary-based models of place mapping (Hartley et al., 2000; Barry et al., 2006) explain the firing  
36 fields of place cells as a sum of distance inputs from nearby boundaries, and the existence of boundary  
37 cells in the rodent subiculum (Lever et al., 2009) and border cells in the entorhinal cortex (EC) (Solstad  
38 et al., 2008) provide evidence of boundary representations at the single neuron level. Boundary cells  
39 are theta-modulated, like other spatial cells, and are characterized by their increased firing in response  
40 to nearby boundary structures, such as walls, drop-offs, and traversable gaps on the floor (Lever et  
41 al., 2009; Stewart et al., 2014). They develop in rat pups at the same time as place cells and earlier  
42 than grid cells (Bjerknes et al., 2014).

43 Although boundary cells have yet to be found in the human brain, behavioral experiments suggest  
44 that we share similar boundary-based navigational mechanisms with other animals. For an extended  
45 period in human development, boundaries exert a dominant influence on spatial mapping (Hermer-  
46 Vazquez et al., 2001). Such boundaries are not limited to large walls but also include subtle 3D  
47 structures such as traversable ridges and curbs (Lee & Spelke, 2008, 2011), similar to the charac-  
48 teristics of boundary cells in rodents discussed above. The use of environmental boundaries can also  
49 be seen in adults (Hermer-Vazquez et al., 1999; Hartley et al., 2004), and functional neuroimaging  
50 studies have established that boundary-based navigation or imagery engages the hippocampus (Doeller  
51 et al., 2008; Bird et al., 2010). Other studies have identified boundary representation of visual scenes  
52 and its role in navigation upstream from the hippocampus (Park et al., 2011; Ferrara & Park, 2016;  
53 Julian et al., 2016).

54 Challenges to single-cell recording in humans can be partially bypassed by looking for signatures  
55 of neural activity that would be visible at the population level. An example of this is the hexagonally  
56 clustered fMRI response in the entorhinal cortex that might be attributed to populations of grid cells  
57 (Doeller et al., 2010). Similarly, neural signals of boundary representations could also be visible at  
58 the population level, owing to their clustered activity when an animal is near a boundary (Solstad et  
59 al., 2008; Lever et al., 2009). Despite the availability of direct intracranial electroencephalography  
60 (iEEG) recordings from the human medial temporal lobe during computer-based navigation tasks (e.g.,  
61 Ekstrom et al., 2005; Watrous et al., 2011; Miller et al., 2013; Vass et al., 2016), no studies thus  
62 far have shown direct neural signatures of boundary representation in humans. In the present study,  
63 we recorded the local field potential (LFP) from surgical epilepsy patients engaged in a computer-  
64 based navigation task, combined with a high-resolution electrode localization method, to investigate  
65 boundary-related signals in the human brain in specific subregions of the hippocampal formation (i.e.,  
66 CA1, Dentate Gyrus, Subiculum, EC, and Perirhinal Cortex). We capitalized on the fact that bound-  
67 ary cells, like other spatial cells, are theta-modulated (e.g., Lever et al., 2009) and that the strength

68 of theta oscillations could indicate neural activity in the hippocampus (McFarland et al., 1975; Mc-  
69 Naughton et al., 1983; Rivas et al., 1996; Czurko et al., 1999; Terrazas et al., 2005). We compared  
70 oscillatory power in three frequency ranges that have been previously implicated in spatial navigation  
71 and memory in humans (Nyhus & Curran, 2010; Watrous et al., 2013; Jacobs, 2014)—1–4 Hz (“low  
72 theta” or “delta”), 4–10 Hz (“theta”), 30–90 Hz (“gamma”)— as subjects encoded targets near or  
73 far from the boundaries of the virtual environment.

## 74 **Methods**

75 **Participants.** The subjects in our study were 58 epilepsy patients between the ages 18 and 65,  
76 who had electrodes surgically implanted to localize seizure foci and guide potential surgical treatment.  
77 Subjects performed a virtual navigation task on a laptop computer as their neural activity was recorded  
78 at 500 Hz or above (Jacobs & Kahana, 2010). Electrodes were implanted in various brain regions as  
79 dictated by clinical needs; for the analysis of neural measurements, we selectively analyzed 39 of the  
80 patients who had electrodes in our five regions of interest: CA1, Dentate gyrus, subiculum, entorhinal,  
81 and perirhinal cortex. These regions were chose because they were the top five hippocampal subregions  
82 with the most number of electrodes implanted; 39 subjects had electrodes in those regions. The same  
83 methods were applied at seven testing sites: Thomas Jefferson University Hospital (Philadelphia,  
84 PA), Mayo Clinic (Rochester, MN), University of Texas Southwestern (Dallas, TX), Geisel School of  
85 Medicine at Dartmouth (Hanover, NH), University of Pennsylvania Medical Center (Philadelphia, PA),  
86 Emory University Hospital (Atlanta, GA), and Columbia University Medical Center (New York, NY).  
87 Each subject provided informed consent prior to participation. Our multi-site study was approved by  
88 local institutional review boards (IRBs), as well as the IRB of the University of Pennsylvania (data  
89 coordination site) and the Human Research Protection Office (HRPO) at the Space and Naval Warfare  
90 Systems Command Systems Center Pacific (SPAWAR/SSC). Data from five subjects who responded  
91 randomly in the task (see below for details) were excluded from our analysis.

92 **Spatial Navigation Task.** Subjects performed a computer-based spatial memory task (Jacobs et  
93 al., 2016) in a virtual rectangular arena (approximately equivalent to 19 m x 10.5 m) with four distal  
94 visual cues for orienting. Each trial (48 trials per session, 1–3 sessions per subject) began with a 2 s  
95 period during which subjects were presented with a still scene of the environment. Then, a target  
96 object appeared on screen and subjects were automatically rotated (1 s duration) and driven toward  
97 (3 s duration, constant speed), until they were stopped at the target location (1 s duration). This  
98 5 second long encoding period took place twice, from two different viewpoints in the environment.  
99 Then, after a 5 s delay, subjects were transported to a different location/direction (chosen randomly  
100 from a range of locations that would fit the 3 seconds of driving and 1 second of rotating) from which  
101 they had to drive themselves back using a joystick to the now hidden target and press a response  
102 button. The two encoding periods were separated by a 5 s black screen. Subjects received feedback  
103 on their responses by means of a simple rectangular depiction the environment with the target and  
104 response locations marked as circular points (see Figure 1a). The automatized design of the encoding  
105 phase ensured that all aspects of a subject’s movement (e.g., time, speed, distance, visual flow,  
106 movement) were identical across trials (and across target locations), while maximizing the number of  
107 trials.

108 **Electrode Localization.** Prior to surgical electrode implantation, we acquired high-resolution struc-  
109 tural magnetic resonance imaging (MRI) scans of the hippocampus and medial temporal lobe from



110 each subject (0.5 mm by 0.5mm by 2mm). The hippocampal subregions and extra-hippocampal cortical regions were automatically defined and labeled on these scanned images using a multi-atlas based segmentation technique (Wang et al., 2013; Yushkevich et al., 2015). After the electrode implantation, a neuroradiologist identified each electrode contact using a post-implant CT scan. The MRI and CT scans were co-registered using Advanced Normalization Tools (Avants et al., 2008), and the neuroradiologist visually confirmed and provided additional detail on the localization and anatomical label for each contact (see Duvernoy, 2005).

117 **Statistical Analysis of Behavior.** We measured patients' memory performance in a way that accounted for unequal distribution of possible distance errors across the environment. An example of this issue is that objects at the far ends of the environment have a larger maximum possible error distance compared to objects in the center. In our approach we measured performance for each response by computing a memory score (MS), which normalizes for overall difficulty across target locations by computing the actual response's rank relative to a distribution of a chance distribution based on 100,000 randomly-generated response locations. This means that MS of 1 corresponds to a perfect response (0 error), MS of 0 corresponded to the worst possible response, and MS of 0.5 was chance). We then divided the environment into two equal regions (an outer rectangular ring ("Boundary") and a central area ("Inner")) and compared subjects' mean MSs between the two zones (see Figure 1c-d). In order to select only those subjects who understood and were able to perform the task, we discarded data from five subjects who performed overall at chance level (t-test against chance MS of 0.5, n.s.).

129 **Statistical Analysis of Neural Signals.** To compare neural activity between trials in which subjects were successfully encoding both *Boundary* and *Inner* locations (rather than being disoriented or inattentive), we first deleted all trials in which subjects did not successfully encode spatial location (MS < 0.73, chosen based on the mean MS across all subjects) in order to reduce noise. Furthermore, we only included subjects that had at least 5 trials in each category (Boundary/Inner), in order to ensure sufficient sampling.

135 We extracted the oscillatory power at each electrode in three frequency bands: low-theta (1–4 Hz), theta (4–10 Hz), and gamma (30–90 Hz). The signals were bandpass filtered in these ranges using a Butterworth filter, notch-filtered at 60 Hz, and the amplitude was extracted with a Hilbert transform (Freeman, 2007). We then computed the time-averaged power in each band across the 5-second encoding period. The power values were then z-scored according to the mean power in that electrode over all encoding periods in the session.

141 We averaged the power over all electrodes from the same hemisphere of a single patient, such that we took one measurement from each hemisphere and used these as the input to our analysis of variance. This was done in order to prevent double-sampling from shared signal sources within different contacts on a subject's medial temporal lobe within one hemisphere. Using this method, we had 18 subiculum hemispheric samples (12 in left hemisphere (LH)) from 15 patients (i.e., 3 patients with bilateral subiculum electrodes), 18 entorhinal samples (13 from LH) from 14 patients, and 43 CA1 samples (25 in LH) from 37 patients, 23 dentate gyrus samples (15 in LH) from 21 patients, and 29 perirhinal samples (20 from LH) from 22 subjects.

## 149 Results

150 **Behavior.** If boundaries are crucial to the neural representation of spatial location, subjects should generally be more accurate in their performance for locations near boundaries than for locations far

152 from boundaries (Hartley et al., 2004). To test the degree to which subjects rely on the environmental  
153 boundaries to perform our task, we divided the environment into two regions with equal areas (an outer  
154 rectangular ring ("Boundary") and a central area ("Inner"), see Figure 1c) and compared subjects'  
155 performance as quantified by their memory scores (MS) (see *Methods* for details). A pairwise t-test  
156 revealed that subjects performed better in *Boundary* trials than in *Inner* trials ( $t(57)=3.74$ ,  $p=0.0004$ ;  
157 see Figure 1d). These results are consistent with the interpretation that boundaries have a significant  
158 influence on the computation of spatial location and indicate that our virtual-reality task sufficiently  
159 engaged those underlying navigational mechanisms.

160 **Neural Results.** A repeated-measures analysis of variance was conducted to examine at the popula-  
161 tion level whether neural signals at three frequency ranges (1–4 Hz, 4–10 Hz, and 30–90 Hz; within-  
162 subjects measure) varied according to the presence of a nearby boundary (within-subjects measure)  
163 across five different subregions of the hippocampus (CA1, Dentate Gyrus, Subiculum, EC, Perirhinal  
164 Cortex) (Figure 2a).

165 Critically, we found that LFP power across all electrodes significantly varied according to whether  
166 the patient encoded a location near or far from a boundary, at particular frequency ranges and local-  
167 ized to a particular region (Boundary  $\times$  Frequency  $\times$  Region interaction:  $F(8,248)=1.99$ ,  $p=0.047$ , )  
168 (Figure 2b). Upon closer inspection, the Boundary  $\times$  Frequency effect was specific to the subiculum  
169 ( $F(2,34)=4.71$ ,  $p=0.016$ ,  $\eta^2=0.22$ ) and significant in no other region (all  $F$ 's  $< 2$ ,  $p$ 's  $> 0.2$ ).  
170 Post-hoc t-tests (Bonferroni corrected) revealed that encoding locations near boundaries elicited  
171 greater low-theta and theta power than encoding inner locations (1–4 Hz:  $t(17)=2.58$ ,  $p=0.057$ ;  
172 4–10 Hz:  $t(17)=3.22$ ,  $p = 0.015$ ; Figure 3a). This effect was not present in the 30–90-Hz gamma  
173 band ( $t(17) < 1$ , n.s.).

174 We next examined this boundary-related signal at the level of individual hemispheric measurements  
175 and subjects. 15 out of 18 hemispheric subiculum measurements showed greater theta power for  
176 navigating to boundary locations than inner locations (binomial test,  $p=0.008$ ); this was in 12 out of  
177 15 subjects (binomial test,  $p=0.035$ ). In some cases, the boundary effect was significant even at the  
178 single-session level (see Figure 4). Across all electrodes, there was a significant negative correlation  
179 between LFP power on each trial and distance to the closest boundary, for both low theta (1–4  
180 Hz,  $p = 0.01$ ) and theta (4–10 Hz,  $p = 0.01$ ), showing that the target location's proximity to the  
181 environmental walls elicited stronger signals in those frequencies (Figure 3b); this indicates that the  
182 boundary effect found above is not an artificial consequence our particular designation of *Boundary*  
183 and *Inner* regions. Because only 6 out of the 18 subicular samples were from the right hemisphere,  
184 we did not have sufficient power to test for hemispheric differences.

185 Although we excluded the trials with memory scores below mean performance ( $MS < 0.73$ ) in the  
186 above analyses, it is still possible that the difference in theta power between the boundary cate-  
187 gories simply reflected performance differences between *Boundary* and *Inner* locations (as opposed  
188 to boundary proximity per se). If this were true, we should also see theta effects related to per-  
189 formance within the same boundary category (i.e., even for just *Inner* locations, good trials should  
190 exhibit higher theta power than bad trials). To test this, we compared LFP power between the "good"  
191 trials ( $MS > 0.73$ ) and (the previously excluded) "bad" trials ( $MS < 0.73$ ), separately for each boundary  
192 category. We found no performance effects, for both *Boundary* and *Inner* trials (all  $t$ 's  $\leq 1.2$ , n.s.),  
193 suggesting that subicular theta was not linked directly to performance. Furthermore, there were no  
194 significant boundary-inner differences in the "bad" trials, suggesting also that the theta effect is not  
195 simply driven by perceptual stimulus/visual differences between the boundary and inner trials. Inter-  
196 estingly, however, when comparing across performance categories, even the "bad" boundary trials  
197 elicited significantly higher theta power than the "good" inner trials,  $t(17)=2.57$ ,  $p=0.02$  ( $t < 1.1$  for

198 low-theta and gamma).

199 As a further control to ensure that the difference between boundary and inner trials is truly driven  
200 by the target, we analyzed the LFP signals during the first two seconds of each trial, when the subject  
201 was standing within the virtual environment and waiting for the target object to appear ( $-2$  to  $0$   
202 seconds prior to the encoding period; Figure 1a). As expected, before the target object actually  
203 appeared on screen, there were no differences between the boundary or in the inner region (all  $t$ 's $<1$ ,  
204 n.s.). Additionally, to examine whether neural activity varied with respect to the subject's own location  
205 during that two-second period, we compared LFP as a function of the subject's position (rather than  
206 the target position) in the virtual space. We found no effects of boundary proximity in any frequency  
207 band (all  $t$ 's $<1.5$ , n.s.). These results are consistent with the interpretation that subjects mainly  
208 represented the goal location during the encoding phase of this task.

## 209 Discussion

210 Our analysis of the local field potential at various hippocampal subregions reveals for the first time in  
211 humans that the subiculum may play a key role in boundary-based spatial mapping. This finding ex-  
212 tends previous neuroimaging studies implicating the human hippocampus in boundary-based navigation  
213 (Doeller et al., 2008; Bird et al., 2010) and is convergent with single-unit recording of boundary cells in  
214 the rodent subiculum (Lever et al., 2009). Interestingly, although rodents have boundary-related cells  
215 in both subiculum (Lever et al., 2009) and the EC (Solstad et al., 2008), we found boundary-related  
216 effects only in the former. One potential explanation for this difference is that the subiculum is more  
217 strongly involved than the EC in boundary-based spatial mapping. This account is consistent with  
218 rodent studies that reported a much higher percentage of boundary cells in the subiculum: (20–25%  
219 Lever et al., 2009; Olson & Nitz, 2017) than EC (6–11% Solstad et al., 2008; Boccara et al., 2010;  
220 Bjercknes et al., 2014; Tang et al., 2014).

221 Could the increase in theta power for boundary-encoding be the result of increased activity from  
222 populations of human subicular boundary cells? Unlike other spatial cell types, which activate fairly  
223 evenly across an environment, the entire boundary-cell network is more active overall when representing  
224 particular areas of an environment (i.e., near boundaries). This coarse-grained spatial specificity in its  
225 firing properties is essential for our identification of boundary-related LFP activity. The theta effect  
226 we observed might be broadly interpreted as a manifestation of boundary-based spatial encoding or  
227 navigation strategies. At the same time, however, it could signify the existence and dynamic activation  
228 of boundary-coding cells in the human subiculum. It is noted, however, that this type of boundary-  
229 related LFP signal change has not yet been analyzed in rodents, perhaps due to logistical confounds  
230 in performing this comparison, such as the variable behaviors of rodents across the environment. For  
231 instance, animals run at higher mean speeds parallel to walls (Horev et al., 2006) and theta power  
232 increases with running speed (Rivas et al., 1996; Czurko et al., 1999; Maurer et al., 2005), potentially  
233 making it difficult to isolate boundary-related theta effects in rodents.

234 The boundary-related theta patterns we observed appeared during the encoding period of our task  
235 when the target location which was visible for 5 s as the subject was automatically moved towards  
236 it at a fixed velocity. Although this task design is different from traditional tests of navigation,  
237 we implemented this fixed-movement encoding period because it allowed us to equate for multiple  
238 perceptual, behavioral, and motoric factors across all trials and for all subjects (Jacobs et al., 2016).  
239 In other words, the boundary effect here cannot be attributed to differences in path length or shape,  
240 joystick control, speed, visual flow, timing and trial length, just to name a few, between trial with  
241 boundary and inner targets. For the same reasons, we have chosen to analyze the encoding phase  
242 rather than the freely-moving response phase, in which none of the above factors could be controlled.

243 The fact that our findings are specific to the target location, rather than the goal location, adds to  
244 the body of evidence suggesting a role for the hippocampal formation in attended, viewed, imagined,  
245 and planned spatial mapping (Rolls, 1999; Hok et al., 2007; Killian et al., 2012; Pfeiffer & Foster, 2013;  
246 Horner et al., 2016; Bellmund et al., 2016) and goal representation (Howard et al., 2014; Chadwick  
247 et al., 2015). Under different circumstances, however, it may be possible to detect boundary encoding  
248 with respect to self-location rather than the goal location. Our task required subjects to maximally  
249 attend to the location of the target, for the five brief seconds that it was on screen; moreover, the  
250 automated movement during the encoding period made it unnecessary for subjects to attend to their  
251 own navigation through space. A different task design requiring subjects to track and control their  
252 own position may detect boundary representations with respect to self location (Ekstrom et al., 2003;  
253 Jacobs et al., 2013).

254 Past studies using human intracranial recordings have demonstrated the involvement of both slow  
255 theta (1–4 Hz) and fast theta (4–10 Hz) during both real and virtual navigation (Aghajan et al.,  
256 2016; Bohbot et al., 2017); and low frequency oscillations seem to be functionally involved in human  
257 memory and navigation (Watrous et al., 2013; Jacobs, 2014). Our boundary-related effects were  
258 most strongly seen in the conventional 4–10-Hz range where theta oscillations are commonly found  
259 in rodents, but we did also observe a trend, albeit more weakly, at 1–4 Hz. It is possible that both  
260 low-theta and theta bands may be implicated in spatial processing in humans. The present results may  
261 provide insight that guides future work on identifying potential functional differences between these  
262 two bands.

263 Another open question for further study involves the dissociation of theta power increases in the  
264 medial temporal lobe related to memory performance with those related to spatial representation (as  
265 we have found in this study). It is difficult to completely disentangle spatial encoding of boundaries to  
266 spatial memory, given that successful performance should be a functional consequence of successful  
267 spatial encoding, after all. Nevertheless, our control analyses show that the theta increases that we  
268 have observed in this task are not solely attributable to memory performance. Moreover, the detailed  
269 localization of these effects to the subiculum make it unlikely that these theta effects are actually  
270 related to memory (which is a hippocampus-wide phenomenon) rather than to spatial boundaries.

271 Spatial mapping is one of the most essential survival skills for any self-locomoting animal, and  
272 accurate metric representation of distance is essential to accurate place mapping; environmental  
273 boundaries, even in naturalistic terrains, provide a stable, invariant cue by which distance representa-  
274 tions can be anchored and corrected (Gallistel, 1990). Researchers have suspected for nearly 70 years  
275 that even distantly related species like rats and humans share cognitive and neural mechanisms that  
276 support such abilities (Tolman, 1948; O'Keefe & Nadel, 1978), and our results fill an important gap  
277 in the literature by identifying for the first time a highly-localized neural representation of environ-  
278 mental boundaries in the human subiculum, just as in rats. Not only do these findings inform theories  
279 of common spatial coding in the vertebrate brain, they also give us another neural signature which  
280 we can use to investigate the flexible application of basic hippocampal representations in supporting  
281 abstract human conceptual knowledge (Spelke et al., 2010; Jacobs & Lee, 2016; Constantinescu et  
282 al., 2016; Garvert et al., 2017) and the cognitive impairments that result from their dysfunction (Bird  
283 et al., 2009; Lakusta et al., 2010).

## 284 References

- 285 Aghajan, Z. M., Schuette, P., Fields, T., Tran, M., Siddiqui, S., Hasulak, N., ... others (2016).  
286 Theta oscillations in the human medial temporal lobe during real world ambulatory movement.  
287 *bioRxiv*, 078055.
- 288 Avants, B. B., Epstein, C. L., Grossman, M., & Gee, J. C. (2008). Symmetric diffeomorphic image  
289 registration with cross-correlation: evaluating automated labeling of elderly and neurodegener-  
290 ative brain. *Medical Image Analysis*, *12*(1), 26–41.
- 291 Barry, C., Lever, C., Hayman, R., Hartley, T., Burton, S., O'Keefe, J., ... Burgess, N. (2006).  
292 The boundary vector cell model of place cell firing and spatial memory. *Rev Neurosci*, *17*(1-2),  
293 71–97.
- 294 Bellmund, J. L. S., Deuker, L., Schröder, T. N., & Doeller, C. F. (2016). Grid-cell representations in  
295 mental simulation. *eLife*, 17089.
- 296 Bird, C. M., Capponi, C., King, J. A., Doeller, C. F., & Burgess, N. (2010). Establishing the bound-  
297 aries: The hippocampal contribution to imagining scenes. *Journal of Neuroscience*, *30*(35),  
298 11688–11695.
- 299 Bird, C. M., Chan, D., Hartley, T., Pijnenburg, Y. A., Rossor, M. N., & Burgess, N. (2009).  
300 Topographical short-term memory differentiates alzheimer's disease from frontotemporal lobar  
301 degeneration. *Hippocampus*, *20*(10), 1154–1169.
- 302 Bjerknes, T. L., Moser, E. I., & Moser, M.-B. (2014). Representation of geometric borders in the  
303 developing rat. *Neuron*, *82*(1), 71–78.
- 304 Boccara, C., Sargolini, F., Thoresen, V., Solstad, T., Witter, M., Moser, E. I., & Moser, M.-B.  
305 (2010). Grid cells in pre- and parasubiculum. *Nature Neuroscience*, *13*, 987–994.
- 306 Bohbot, V. D., Copara, M. S., Gotman, J., & Ekstrom, A. D. (2017). Low-frequency theta oscillations  
307 in the human hippocampus during real-world and virtual navigation. *Nature Communications*,  
308 *8*, 14415.
- 309 Chadwick, M. J., Jolly, A. E. J., Amos, D. P., Hassabis, D., & Spiers, H. J. (2015). A goal direction  
310 signal in the human entorhinal/subicular region. *Current Biology*, *25*(1), 87–92.
- 311 Cheng, K. (1986). A purely geometric module in the rat's spatial representation. *Cognition*, *23*,  
312 149–178.
- 313 Cheng, K., & Newcombe, N. (2005). Is there a geometric module for spatial orientation? squaring  
314 theory and evidence. *Psychonomic Bulletin & Review*, *12*(1), 1.
- 315 Constantinescu, A. O., O'Reilly, J. X., & Behrens, T. E. J. (2016). Organizing conceptual knowledge  
316 in humans with a gridlike code. *Science*, *352*, 1464–1468.
- 317 Czurko, A., Hirase, H., Csicsvari, J., & Buzsáki, G. (1999). Sustained activation of hippocampal  
318 pyramidal cells by 'space clamping' in a running wheel. *European Journal of Neuroscience*,  
319 *11*(1), 344–352.
- 320 Doeller, C. F., Barry, C., & Burgess, N. (2010). Evidence for grid cells in a human memory network.  
321 *Nature*, *463*(7281), 657–661.
- 322 Doeller, C. F., King, J. A., & Burgess, N. (2008). Parallel striatal and hippocampal systems for  
323 landmarks and boundaries in spatial memory. *Proceedings of the National Academy of Sciences*,  
324 *USA*, *105*(15), 5915–5920.
- 325 Duvernoy, H. M. (2005). *The human hippocampus: functional anatomy, vascularization and serial*  
326 *sections with mri*. Springer Science & Business Media.
- 327 Ekstrom, A. D., Caplan, J., Ho, E., Shattuck, K., Fried, I., & Kahana, M. (2005). Human hippocampal  
328 theta activity during virtual navigation. *Hippocampus*, *15*, 881–889.



- 329 Ekstrom, A. D., Kahana, M. J., Caplan, J. B., Fields, T. A., Isham, E. A., Newman, E. L., & Fried,  
330 I. (2003). Cellular networks underlying human spatial navigation. *Nature*, *425*, 184–187.
- 331 Etienne, A. S., Maurer, R., & Séguinot, V. (1996). Path integration in mammals and its interaction  
332 with visual landmarks. *Journal of Experimental Biology*, *199*, 201–209.
- 333 Ferrara, K., & Park, S. (2016). Neural representation of scene boundaries. *Neuropsychologia*, *89*,  
334 180–190.
- 335 Freeman, W. (2007). Hilbert transform for brain waves. *Scholarpedia*, *2*(1), 1338.
- 336 Gallistel, C. R. (1990). *The organization of learning*. MIT Press.
- 337 Garvert, M. M., Dolan, R. J., & Behrens, T. E. J. (2017). A map of abstract relational knowledge  
338 in the human hippocampal–entorhinal cortex. *eLife*, *6*, e17086.
- 339 Hardcastle, K., Ganguli, S., & Giocomo, L. M. (2015). Environmental boundaries as an error correction  
340 mechanism for grid cells. *Neuron*, *86*, 827–839.
- 341 Hartley, T., Burgess, N., Lever, C., Cacucci, F., & O’Keefe, J. (2000). Modeling place fields in terms  
342 of the cortical inputs to the hippocampus. *Hippocampus*, *10*(4), 369–79.
- 343 Hartley, T., Trinkl, I., & Burgess, N. (2004). Geometric determinants of human spatial memory.  
344 *Cognition*, *94*, 39–75.
- 345 Hermer-Vazquez, L., Moffet, A., & Munkholm, P. (2001). Language, space, and the development of  
346 cognitive flexibility in humans: The case of two spatial memory tasks. *Cognition*, *79*, 263–299.
- 347 Hermer-Vazquez, L., Spelke, E. S., & Katsnelson, A. (1999). Sources of flexibility in human cognition:  
348 dual-task studies of space and language. *Cognitive Psychology*, *39*, 3–36.
- 349 Hok, V., Lenck-Santini, P. P., Roux, S., Save, E., Muller, R. U., & Poucet, B. (2007). Goal-related  
350 activity in Hippocampal place cells. *Journal of Neuroscience*, *27*, 472–482.
- 351 Horev, G., Benjamin, Y., Sakov, A., & Golani, I. (2006). Estimating wall guidance and attraction in  
352 mouse free locomotor behavior. *Genes, Brain, and Behavior*, *6*(1), 30–41.
- 353 Horner, A. J., Bisby, J. A., Zotow, E., Bush, D., & Burgess, N. (2016). Grid-like processing of  
354 imagined navigation. *Current Biology*, *26*, 842–847.
- 355 Howard, L. R., Javadi, A. H., Yu, Y., Mill, R. D., Morrison, L. C., Knight, R., ... Spiers, H. J. (2014).  
356 The hippocampus and entorhinal cortex encode the path and euclidean distances to goals during  
357 navigation. *Current Biology*, *24*(12), 1331–1340.
- 358 Jacobs, J. (2014). Hippocampal theta oscillations are slower in humans than in rodents: implications  
359 for models of spatial navigation and memory. *Philosophical Transactions of the Royal Society  
360 B: Biological Sciences*, *369*(1635), 20130304.
- 361 Jacobs, J., & Kahana, M. J. (2010). Direct brain recordings fuel advances in cognitive electrophysi-  
362 ology. *Trends in Cognitive Sciences*, *14*(4), 162–171.
- 363 Jacobs, J., & Lee, S. A. (2016). Spatial cognition: Grid cells support imagined navigation. *Current  
364 Biology*, *26*(7), R277–R279.
- 365 Jacobs, J., Miller, J., Lee, S. A., Coffey, T., Watrous, A. J., Sperling, M. R., ... Rizzuto, D. S.  
366 (2016, December). Direct electrical stimulation of the human entorhinal region and hippocampus  
367 impairs memory. *Neuron*, *92*(5), 1–8.
- 368 Jacobs, J., Weidemann, C. T., Miller, J. F., Solway, A., Burke, J. F., Wei, X., ... Kahana, M. J.  
369 (2013). Direct recordings of grid-like neuronal activity in human spatial navigation. *Nature  
370 Neuroscience*, *16*(9), 1188–1190.
- 371 Julian, J. B., Hamilton, R. H., & Epstein, R. A. (2016). The occipital place area is causally involved  
372 in representing environmental boundaries during navigation. *Current Biology*, *26*, 1104–1109.
- 373 Julian, J. B., Keinath, A. T., Muzzio, I. A., & Epstein, R. A. (2015). Place recognition and heading  
374 retrieval are mediated by dissociable cognitive systems in mice. *PNAS*, *112*, 6503–6508.

- 375 Killian, N., Jutras, M., & Buffalo, E. (2012). A map of visual space in the primate entorhinal cortex.  
376 *Nature*, 491(7426), 761–764.
- 377 Krupic, J., Bauza, M., Burton, S., Barry, C., & O’Keefe, J. (2015). Grid cell symmetry is shaped by  
378 environmental geometry. *Nature*, 518(7538), 232–235.
- 379 Lakusta, L., Dessalegn, B., & Landau, B. (2010). Impaired geometric reorientation caused by genetic  
380 defect. *Proceedings of the National Academy of Sciences*, 107(7), 2813–2817.
- 381 Lee, S. A. (2017). The boundary-based view of spatial cognition: a synthesis. *Current Opinion in*  
382 *Behavioral Sciences*, 16, 58–65.
- 383 Lee, S. A., Shusterman, A., & Spelke, E. S. (2006). Reorientation and landmark-guided search by  
384 young children: Evidence for two systems. *Psychological Science*, 17, 577–582.
- 385 Lee, S. A., & Spelke, E. S. (2008). Children’s use of geometry for reorientation. *Developmental*  
386 *Science*, 11, 743–749.
- 387 Lee, S. A., & Spelke, E. S. (2010). Two systems of spatial representation underlying navigation.  
388 *Experimental Brain Research*, 206, 179–188.
- 389 Lee, S. A., & Spelke, E. S. (2011). Young children reorient by computing layout geometry, not by  
390 matching images of the environment. *Psychological Bulletin and Review*, 18, 192–198.
- 391 Lever, C., Burton, S., Jeewajee, A., O’Keefe, J., & Burgess, N. (2009). Boundary vector cells in the  
392 subiculum of the hippocampal formation. *Journal of Neuroscience*, 29, 9771–9777.
- 393 Lever, C., Wills, T., Cacucci, F., Burgess, N., & O’Keefe, J. (2002). Long-term plasticity in  
394 hippocampal place-cell representation of environmental geometry. *Nature*, 416, 90–94.
- 395 Maurer, A. P., Cowen, S. L., Burke, S. N., CA, C. A. B., & McNaughton, B. L. (2005). Self-motion  
396 and the origin of differential spatial scaling along the septo-temporal axis of the hippocampus.  
397 *Hippocampus*, 15, 841–852.
- 398 McFarland, W. L., Teitelbaum, H., & Hedges, E. K. (1975). Relationship between hippocampal theta  
399 activity and running speed in the rat. *Journal of comparative and physiological psychology*,  
400 88(1), 324.
- 401 McNaughton, B. L., Barnes, C. A., & O’Keefe, J. (1983). The contributions of position, direction,  
402 and velocity to single unit activity in the hippocampus of freely-moving rats. *Experimental Brain*  
403 *Research*, 52(1), 41–49.
- 404 Miller, J. F., Neufang, M., Solway, A., Brandt, A., Trippel, M., Mader, I., . . . Schulze-Bonhage, A.  
405 (2013). Neural activity in human hippocampal formation reveals the spatial context of retrieved  
406 memories. *Science*, 342(6162), 1111–1114.
- 407 Nyhus, E., & Curran, T. (2010). Functional role of gamma and theta oscillations in episodic memory.  
408 *Neuroscience & Biobehavioral Reviews*, 34(7), 1023–1035.
- 409 O’Keefe, J., & Burgess, N. (1996). Geometric determinants of the place fields of hippocampal  
410 neurons. , 381(6581), 425–428.
- 411 O’Keefe, J., & Nadel, L. (1978). *The hippocampus as a cognitive map*. New York: Oxford University  
412 Press.
- 413 Olson, J. M., & Nitz, K. T. D. A. (2017). Subiculum neurons map the current axis of travel. *Nature*  
414 *Neuroscience*, 20, 170–172.
- 415 Park, S., Brady, T., Greene, M., & Oliva, A. (2011). Disentangling scene content from spatial  
416 boundary: Complementary roles for the parahippocampal place area and lateral occipital complex  
417 in representing real-world scenes. *Journal of Neuroscience*, 31, 1333–1340.
- 418 Pfeiffer, B. E., & Foster, D. J. (2013). Hippocampal place-cell sequences depict future paths to  
419 remembered goals. *Nature*, 497(7447), 74–79.
- 420 Rivas, J., Gaztelu, J. M., & García-Austt, E. (1996). Changes in hippocampal cell discharge pat-  
421 terns and theta rhythm spectral properties as a function of walking velocity in the guinea pig.



- 422 *Experimental Brain Research*, 108(1), 113-8.
- 423 Rolls, E. (1999). Spatial view cells and the representation of place in the primate hippocampus.  
424 *Hippocampus*, 9(4), 467–480.
- 425 Solstad, T., Boccara, C., Kropff, E., Moser, M., & Moser, E. (2008). Representation of Geometric  
426 Borders in the Entorhinal Cortex. *Science*, 322(5909), 1865.
- 427 Spelke, E., Lee, S. A., & Izard, V. (2010). Beyond core knowledge: Natural geometry. *Cognitive  
428 Science*, 34(5), 863–884.
- 429 Stensola, T., Stensola, H., Moser, M.-B., & Moser, E. I. (2015). Shearing-induced asymmetry in  
430 entorhinal grid cells. *Nature*, 518(7538), 207–212.
- 431 Stewart, S., Jeewajee, A., Wills, T. J., Burgess, N., & Lever, C. (2014). Boundary coding in the  
432 rat subiculum. *Philosophical Transactions of the Royal Society B: Biological Sciences*, 369,  
433 20120514.
- 434 Tang, Q., Burgalossi, A., Ebbesen, C. L., Ray, S., Naumann, R., Schmidt, H., . . . Brecht, M. (2014).  
435 Pyramidal and stellate cell specificity of grid and border representations in layer 2 of medial  
436 entorhinal cortex. *Neuron*, 84(6), 1191–1197.
- 437 Terrazas, A., Krause, M., Lipa, P., Gothard, K., Barnes, C., & McNaughton, B. (2005). Self-motion  
438 and the hippocampal spatial metric. *Journal of Neuroscience*, 25(35), 8085–8096.
- 439 Tolman, E. C. (1948). Cognitive maps in rats and men. *Psychology Review*, 55, 189–208.
- 440 Tommasi, L., Chiandetti, C., Pecchia, T., Sovrano, V. A., & Vallortigara, G. (2012). From natural  
441 geometry to spatial cognition. *Neuroscience and Biobehavioral Reviews*, 36, 799-824.
- 442 Vass, L. K., Copara, M. S., Seyal, M., Shahlaie, K., Farias, S. T., Shen, P. Y., & Ekstrom, A. D.  
443 (2016). Oscillations go the distance: Low-frequency human hippocampal oscillations code spatial  
444 distance in the absence of sensory cues during teleportation. *Neuron*, 89(6), 1180–1186.
- 445 Wang, H., Suh, J. W., Das, S. R., Pluta, J. B., Craige, C., Yushkevich, P., et al. (2013). Multi-  
446 atlas segmentation with joint label fusion. *Pattern Analysis and Machine Intelligence, IEEE  
447 Transactions on*, 35(3), 611–623.
- 448 Watrous, A. J., Fried, I., & Ekstrom, A. D. (2011). Behavioral correlates of human hippocampal delta  
449 and theta oscillations during navigation. *Journal of Neurophysiology*, 105(4), 1747–1755.
- 450 Watrous, A. J., Tandon, N., Conner, C. R., Pieters, T., & Ekstrom, A. D. (2013). Frequency-specific  
451 network connectivity increases underlie accurate spatiotemporal memory retrieval. *Nature Neu-  
452 roscience*, 16(3), 349–356.
- 453 Yushkevich, P. A., Pluta, J. B., Wang, H., Xie, L., Ding, S.-L., Gertje, E. C., . . . Wolk, D. A.  
454 (2015). Automated volumetry and regional thickness analysis of hippocampal subfields and  
455 medial temporal cortical structures in mild cognitive impairment. *Human Brain Mapping*, 36(1),  
456 258–287.

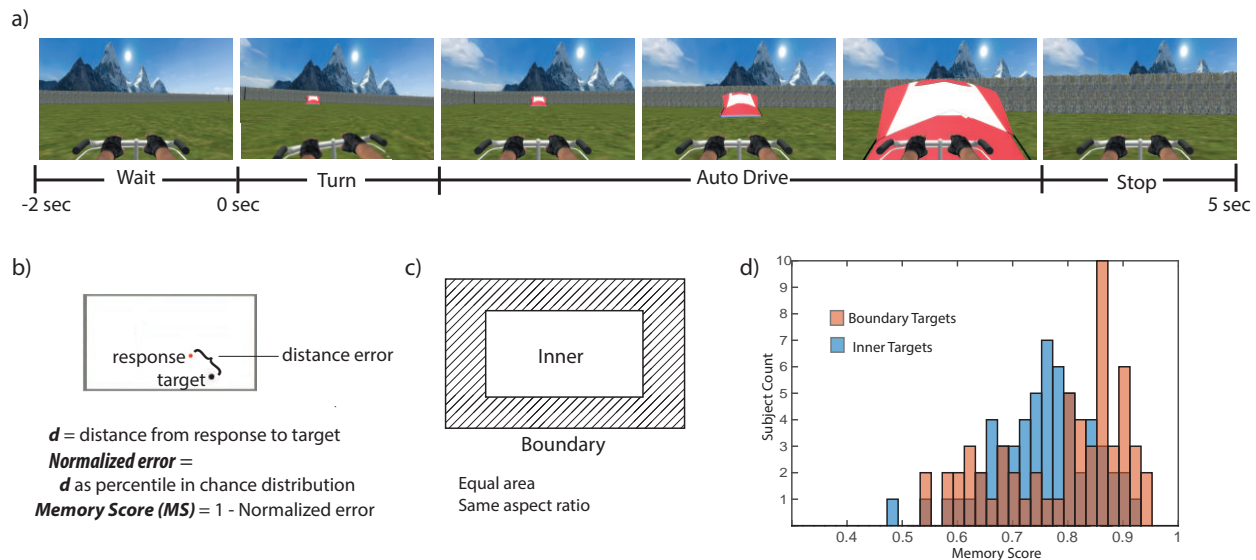

Figure 1: a) Each trial began with a 2 second stationary wait period in which the subject viewed the environment. Once the target object appeared, the subject had 5 seconds of encoding, during which the subject (in the VR environment) was automatically rotated and then driven to the target location. This was repeated from a different starting point, such that there were two encoding trials for each object location. Following the encoding trials, subjects were transported to a new starting point for the test phase and asked to drive themselves back to the goal location and respond by pressing a button. They were shown a map of the goal and their response location and rewarded points accordingly. b) We computed a Memory Score (MS) based on the accuracy percentile, with respect to the chance distribution of responses for each goal location. c) We categorized target locations as being "Boundary" or "Inner" by dividing the rectangular environment into two equal areas with equal aspect ratios. d) Subject-wise distributions of memory scores for Boundary and Inner trials, which indicate that subjects performed better on Boundary trials overall.

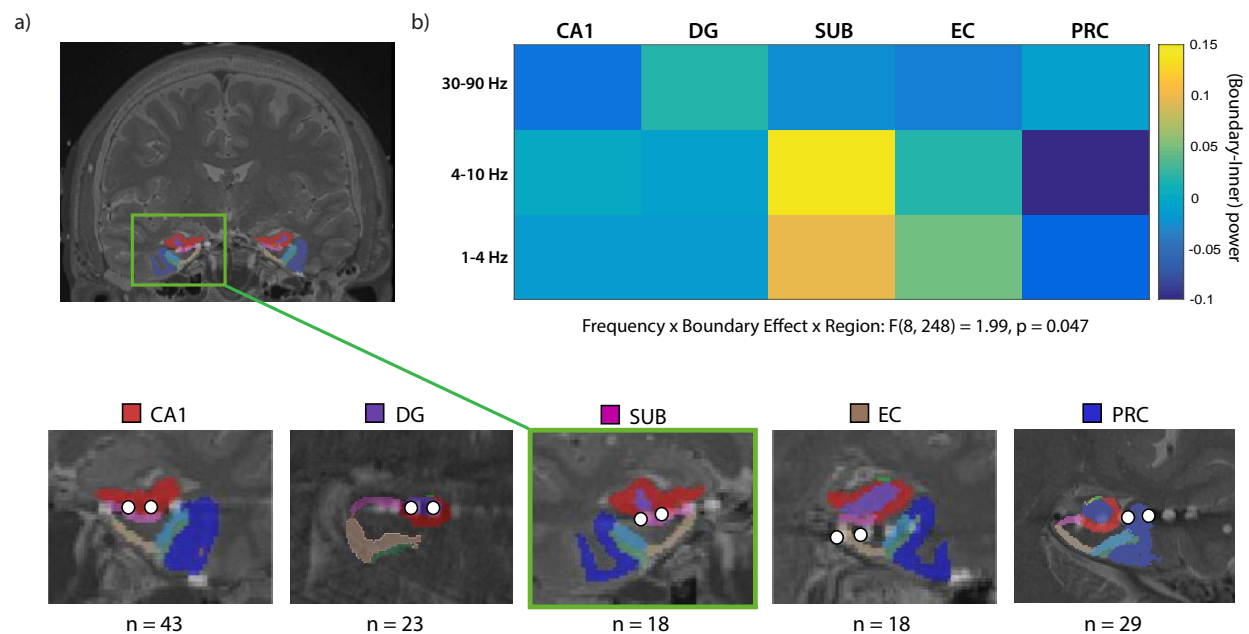

Figure 2: a) Electrodes were localized by combining pre-surgical high-resolution structural MRI and post-implant CT scans. The hippocampal subregions are labeled and shaded color in each example image, and the bipolar electrode contact pairs (distance 1.5 mm) centered at each subregion are marked with white dots. (Images from patient 1066P) b) Encoding near-boundary locations elicited higher power in low frequency oscillations than inner locations. Z-scored power differences between boundary and inner target locations are plotted for three frequency bands (low-theta: 1–4 Hz; theta: 4–10 Hz; gamma: 30–90 Hz). There was a significant Boundary x Frequency interaction that was specific only to the subiculum ( $F(2,34)=4.71, p=0.016$ ) and present in no other region.

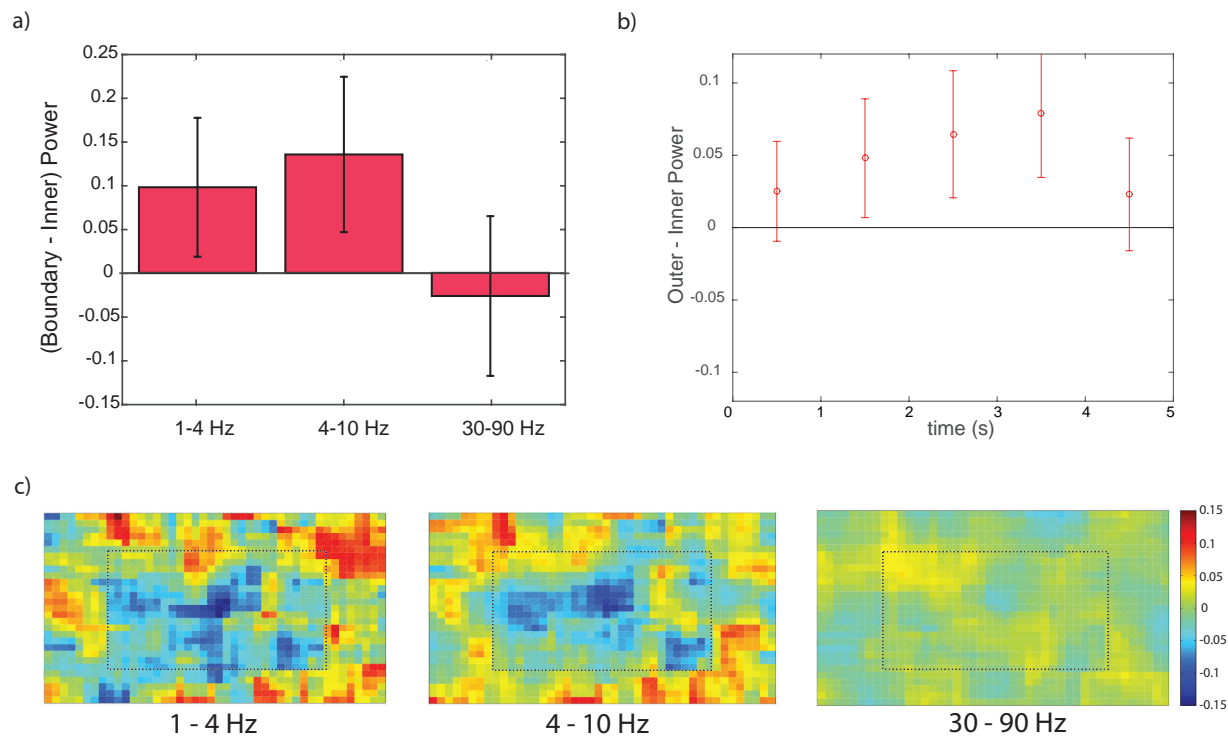

Figure 3: a) Normalized power difference in the subiculum between *Boundary* and *Inner* locations in three frequency bands (low-theta: 1–4 Hz; theta: 4–10 Hz; gamma: 30–90 Hz). Error bars indicate 95% confidence intervals. Goal locations near boundaries elicit stronger theta oscillations than those far from boundaries. (b) Boundary-*Inner* theta power across the five seconds of navigation to the target. (c) Overhead heat-maps of the environment plotting average z-scored power for the three observed frequency bands. We binned the environment into a 45 by 30 rectangular grid and computed average power in each bin for each subicular sample. Individual heat maps were smoothed with a 2D gaussian kernel (width=7) and then averaged across all samples. Dotted lines indicate the *Boundary-*Inner** division.

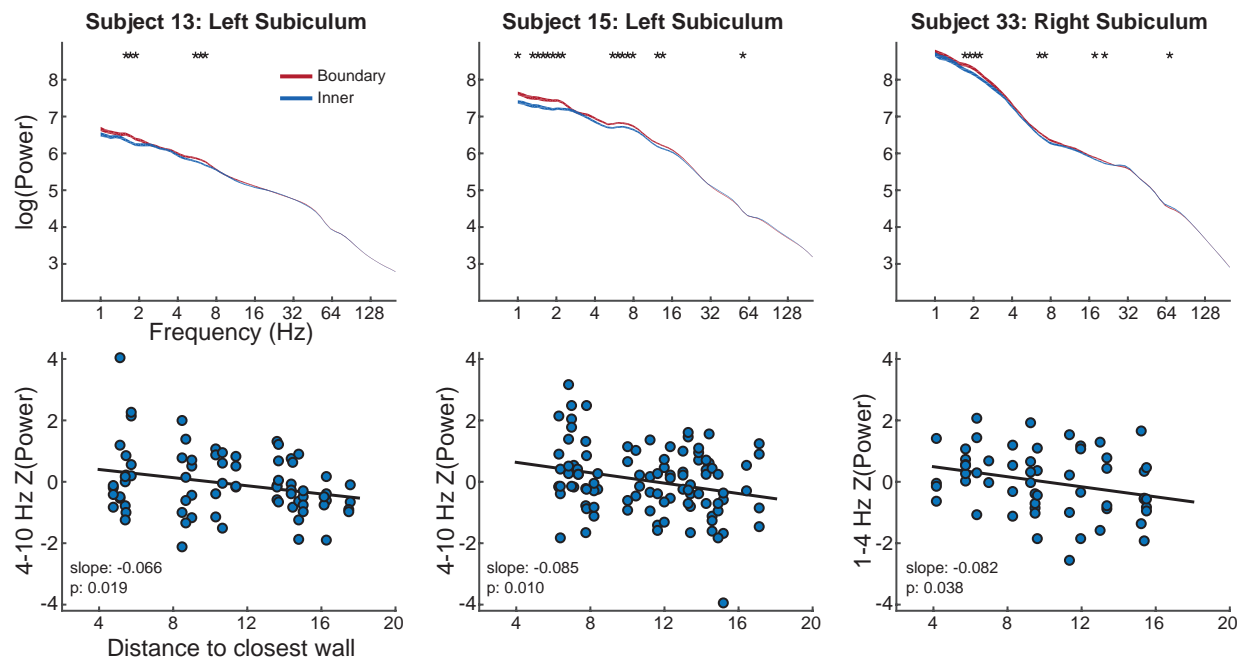

Figure 4: a–c) Each column shows examples of an individual electrode from three different subjects. First row: Examples of power spectra from individual electrodes for *Boundary* and *Inner* trials. Line thickness indicates standard error. Asterisks indicate parts of the spectra where *Boundary* and *Inner* trials significantly differ (t-tests at each frequency,  $p < 0.05$ ). Second row: Trial-by-trial plot of power in theta frequency oscillations for each corresponding electrode above it. Slopes of the best fit lines that negatively deviate from zero show that theta power is stronger at closer distances to a wall boundary.
